# Supplementary material
Source: publisher site journal article supplement (https://www.dovepress.com/article/535434)
Supplement: Supplementary file 1 [file 535434%20Revised%20Supplementary%20Material.docx]

**Supplementary Table_1.** Primers for qRT-PCR analysis.

| Gene | Primer |
| --- | --- |
| ICAM1-F | 5’- ATGCCCAGACATCTGTGTCC-3’ |
| ICAM1-R | 5’- GGGGTCTCTATGCCCAACAA-3’ |
| ICAM5-F | 5’-GGGGCAGATGGTGACAGTAAC-3’ |
| ICAM5-R | 5’-GTCGTTCTCGGTGGCATTTAG-3’ |
| IL1β-F | 5’-ATGATGGCTTATTACAGTGGCAA-3’ |
| IL1β-R | 5’-GTCGGAGATTCGTAGCTGGA-3’ |
| TNFα-F | 5’-CCTCTCTCTAATCAGCCCTCTG-3’ |
| TNFα-R | 5’-GAGGACCTGGGAGTAGATGAG-3’ |
| IL23-F | 5’-CTCAGGGACAACAGTCAGTTC-3’ |
| IL23-R | 5’-ACAGGGCTATCAGGGAGCA-3’ |
| IL6-F | 5’-ACTCACCTCTTCAGAACGAATTG-3’ |
| IL6-R | 5’-CCATCTTTGGAAGGTTCAGGTTG-3’ |
| IL18-F | 5’-TCTTCATTGACCAAGGAAATCGG-3’ |
| IL18-R | 5’-TCCGGGGTGCATTATCTCTAC-3’ |

**Supplementary Table_2.** SMR analysis.

| probeID | ProbeChr | Gene | Probe_bp | topSNP | A1 | A2 | Freq | bSMR | seSMR | pSMR | FDR |
| --- | --- | --- | --- | --- | --- | --- | --- | --- | --- | --- | --- |
| 7161_25 | 1 | H6PD | 9253056 | rs72859354 | A | G | 0.072565 | -1.02216 | 0.286451 | 0.000359 | 0.0006 |
| 16751_15 | 1 | NPPB | 11858204 | rs1476413 | T | C | 0.280318 | 0.800351 | 0.196203 | 4.52E-05 | 0.000119 |
| 7655_11 | 1 | NPPB | 11858204 | rs1476413 | T | C | 0.280318 | 0.298079 | 0.067068 | 8.81E-06 | 2.94E-05 |
| 5238_26 | 1 | PPIE | 39728048 | rs11206437 | C | A | 0.445328 | -1.04087 | 0.300183 | 0.000525 | 0.000725 |
| 5400_52 | 1 | LEPR | 65531106 | rs7551201 | T | C | 0.067594 | -1.31881 | 0.239715 | 3.76E-08 | 2.51E-07 |
| 5637_81 | 1 | NTNG1 | 1.07E+08 | rs61816189 | C | T | 0.063618 | -0.39245 | 0.101662 | 0.000113 | 0.000246 |
| 12727_7 | 1 | PTGFRN | 1.17E+08 | rs1286226 | C | G | 0.588469 | -0.65314 | 0.170583 | 0.000129 | 0.000257 |
| 15370_5 | 1 | BOLA1 | 1.5E+08 | rs72700881 | A | G | 0.065606 | -0.30541 | 0.086749 | 0.00043 | 0.000652 |
| 3366_51 | 1 | ECM1 | 1.51E+08 | rs72700881 | A | G | 0.065606 | -1.02681 | 0.323493 | 0.001503 | 0.001634 |
| 3181_50 | 1 | CTSS | 1.51E+08 | rs72700881 | A | G | 0.065606 | 0.147941 | 0.041608 | 0.000377 | 0.0006 |
| 15602_43 | 1 | IL6R | 1.54E+08 | rs6695045 | G | A | 0.54672 | -0.1006 | 0.021934 | 4.51E-06 | 1.67E-05 |
| 6471_53 | 1 | CFHR4 | 1.97E+08 | rs12117045 | A | G | 0.194831 | -0.62868 | 0.120641 | 1.88E-07 | 1.10E-06 |
| 15584_9 | 1 | CFHR2 | 1.97E+08 | rs12117045 | A | G | 0.194831 | 0.576416 | 0.109413 | 1.38E-07 | 8.61E-07 |
| 16055_3 | 1 | CFHR5 | 1.97E+08 | rs12117045 | A | G | 0.194831 | -1.37686 | 0.306085 | 6.85E-06 | 2.36E-05 |
| 3858_5 | 2 | ACP1 | 271212 | rs116214231 | T | C | 0.089463 | 0.776595 | 0.234895 | 0.000946 | 0.0011 |
| 7980_72 | 2 | B3GNT2 | 62210423 | rs6757244 | C | A | 0.564612 | -0.74972 | 0.15188 | 7.96E-07 | 3.62E-06 |
| 14079_14 | 2 | IL18R1 | 1.02E+08 | rs57619803 | G | A | 0.272366 | -0.92676 | 0.253559 | 0.000257 | 0.000451 |
| 9017_58 | 2 | LCT | 1.36E+08 | rs12691875 | A | C | 0.38171 | 0.260632 | 0.056615 | 4.15E-06 | 1.66E-05 |
| 4559_64 | 2 | KYNU | 1.43E+08 | rs114352177 | A | C | 0.030815 | 0.877375 | 0.253435 | 0.000536 | 0.000725 |
| 12594_5 | 2 | GCA | 1.62E+08 | rs77693762 | T | C | 0.107356 | 0.401189 | 0.077634 | 2.37E-07 | 1.25E-06 |
| 9288_7 | 2 | FKBP7 | 1.78E+08 | rs12615288 | T | C | 0.062624 | 0.394596 | 0.110956 | 0.000376 | 0.0006 |
| 6462_12 | 3 | TIMP4 | 12155990 | rs146058284 | C | T | 0.018887 | 0.375803 | 0.100904 | 0.000196 | 0.000356 |
| 18831_6 | 3 | LRIG1 | 66440030 | rs73127748 | C | A | 0.021869 | 1.05405 | 0.25279 | 3.05E-05 | 8.72E-05 |
| 3617_80 | 4 | HGFAC | 3445727 | rs28484982 | C | G | 0.199801 | -0.36816 | 0.083907 | 1.15E-05 | 3.53E-05 |
| 8814_33 | 4 | PSAPL1 | 7432608 | rs734224 | T | G | 0.189861 | -0.94678 | 0.289094 | 0.001057 | 0.001187 |
| 4467_49 | 4 | SPARCL1 | 87502198 | rs1431560 | C | G | 0.373757 | 1.02113 | 0.341317 | 0.002774 | 0.002774 |
| 3025_50 | 4 | FGF2 | 1.23E+08 | rs309387 | T | A | 0.197813 | 0.453243 | 0.106865 | 2.22E-05 | 6.54E-05 |
| 5089_11 | 5 | IL7R | 35866149 | rs860412 | C | G | 0.28827 | 1.17763 | 0.305004 | 0.000113 | 0.000246 |
| 2888_49 | 5 | C7 | 40964854 | rs78059847 | T | G | 0.057654 | 1.29136 | 0.363259 | 0.000378 | 0.0006 |
| 5620_13 | 5 | PAM | 1.03E+08 | rs2561479 | A | C | 0.348907 | 0.121943 | 0.034882 | 0.000472 | 0.000685 |
| 18819_21 | 5 | PPIC | 1.23E+08 | rs711414 | G | T | 0.804175 | -1.04814 | 0.326035 | 0.001305 | 0.001434 |
| 19124_9 | 5 | UBLCP1 | 1.59E+08 | rs79063318 | A | G | 0.028827 | -1.12908 | 0.284339 | 7.16E-05 | 0.000175 |
| 13733_5 | 5 | IL12B | 1.59E+08 | rs6887695 | C | G | 0.340954 | -0.74463 | 0.077174 | 4.98E-22 | 1.24E-20 |
| 9468_8 | 5 | LMAN2 | 1.77E+08 | rs13153019 | C | T | 0.264414 | 1.34471 | 0.231369 | 6.17E-09 | 5.15E-08 |
| 2730_58 | 6 | MICA | 31407550 | rs6912077 | A | G | 0.180915 | -1.25402 | 0.113301 | 1.79E-28 | 8.96E-27 |
| 5102_55 | 6 | MICB | 31503002 | rs12189871 | T | C | 0.09841 | 1.13613 | 0.036103 | 2.31E-217 | 2.31E-215 |
| 10445_20 | 6 | APOM | 31655313 | rs6912077 | A | G | 0.180915 | -3.41076 | 0.562957 | 1.37E-09 | 1.37E-08 |
| 3186_2 | 6 | C2 | 31921729 | rs6912077 | A | G | 0.180915 | -1.32861 | 0.121846 | 1.10E-27 | 3.68E-26 |
| 5698_60 | 6 | TNXB | 32078244 | rs6912077 | A | G | 0.180915 | -1.8248 | 0.196729 | 1.76E-20 | 3.53E-19 |
| 11387_3 | 6 | ATF6B | 32121758 | rs12189871 | T | C | 0.09841 | -9.32164 | 1.64738 | 1.53E-08 | 1.17E-07 |
| 12378_71 | 6 | TAPBP | 33306989 | rs4713636 | A | G | 0.256461 | -1.67596 | 0.382306 | 1.17E-05 | 3.53E-05 |
| 5631_83 | 6 | MLN | 33799338 | rs4713636 | A | G | 0.256461 | -1.18578 | 0.228605 | 2.14E-07 | 1.19E-06 |
| 14009_65 | 6 | TNFAIP3 | 1.38E+08 | rs62434176 | C | T | 0.025845 | -0.89419 | 0.220366 | 4.95E-05 | 0.000124 |
| 12612_37 | 6 | PSMB1 | 1.71E+08 | rs9460207 | C | T | 0.464215 | 0.602198 | 0.177713 | 0.000702 | 0.000889 |
| 12689_56 | 7 | ARPC1B | 99384532 | rs7798877 | T | C | 0.897614 | 1.25349 | 0.384166 | 0.001103 | 0.001225 |
| 10816_150 | 7 | PILRA | 1E+08 | rs7798877 | T | C | 0.897614 | -0.51674 | 0.13304 | 0.000103 | 0.000233 |
| 6402_8 | 7 | PILRA | 1E+08 | rs7798877 | T | C | 0.897614 | -0.49089 | 0.125885 | 9.64E-05 | 0.000224 |
| 9267_2 | 7 | CPA4 | 1.3E+08 | rs58270997 | T | C | 0.277336 | -0.6636 | 0.192119 | 0.000552 | 0.000736 |
| 10419_1 | 8 | SCARA5 | 27931278 | rs75940731 | G | A | 0.047714 | -1.55989 | 0.417164 | 0.000185 | 0.000342 |
| 11390_24 | 8 | CA8 | 60233406 | rs1000500 | A | G | 0.314115 | 0.573451 | 0.126102 | 5.43E-06 | 1.94E-05 |
| 4155_3 | 9 | TNC | 1.15E+08 | rs1335336 | T | C | 0.298211 | -0.84024 | 0.239993 | 0.000463 | 0.000685 |
| 9796_4 | 9 | CEL | 1.33E+08 | rs8176632 | T | C | 0.17992 | 0.728299 | 0.20107 | 0.000292 | 0.000504 |
| 5680_54 | 9 | OBP2B | 1.33E+08 | rs8176632 | T | C | 0.17992 | -0.52062 | 0.135388 | 0.00012 | 0.000251 |
| 3175_51 | 9 | ADAMTS13 | 1.33E+08 | rs8176632 | T | C | 0.17992 | 0.482001 | 0.122551 | 8.39E-05 | 0.0002 |
| 14054_17 | 10 | IL15RA | 5960913 | rs35040156 | C | G | 0.198807 | 1.03353 | 0.290152 | 0.000368 | 0.0006 |
| 3151_6 | 10 | IL2RA | 6036530 | rs35040156 | C | G | 0.198807 | -1.16093 | 0.327175 | 0.000388 | 0.000606 |
| 19293_6 | 10 | VPS26A | 69148962 | rs10998646 | T | G | 0.574553 | 0.630986 | 0.182026 | 0.000527 | 0.000725 |
| 4158_54 | 10 | PLAU | 73913336 | rs2459446 | T | C | 0.421471 | -0.45262 | 0.082094 | 3.52E-08 | 2.51E-07 |
| 19590_46 | 10 | SFTPD | 79960040 | rs1250563 | C | G | 0.282306 | -0.93312 | 0.182312 | 3.08E-07 | 1.54E-06 |
| 8097_77 | 10 | LIPN | 88769804 | rs118177025 | C | G | 0.031809 | -1.26241 | 0.327689 | 0.000117 | 0.000249 |
| 7921_65 | 11 | FJX1 | 35619662 | rs12800155 | A | G | 0.402584 | -0.73779 | 0.18077 | 4.48E-05 | 0.000119 |
| 7871_16 | 11 | TMEM132A | 60930810 | rs11512743 | A | G | 0.031809 | -1.08441 | 0.330443 | 0.001032 | 0.001173 |
| 15495_9 | 11 | FOLR3 | 72127380 | rs949324 | C | G | 0.975149 | -1.15501 | 0.347505 | 0.000888 | 0.001045 |
| 6576_1 | 12 | ART4 | 14834548 | rs1806197 | G | T | 0.520875 | 0.959089 | 0.310245 | 0.001992 | 0.002097 |
| 12370_30 | 12 | APOF | 56361712 | rs149241310 | G | A | 0.0666 | 0.589206 | 0.099929 | 3.72E-09 | 3.38E-08 |
| 10372_18 | 12 | STAT6 | 57113774 | rs149241310 | G | A | 0.0666 | 1.83282 | 0.399132 | 4.39E-06 | 1.67E-05 |
| 4564_2 | 12 | PLXNC1 | 94228126 | rs76122034 | G | A | 0.022863 | 0.280149 | 0.079078 | 0.000396 | 0.000609 |
| 5131_15 | 13 | TNFRSF19 | 23623237 | rs5024796 | C | T | 0.895626 | -0.72382 | 0.20902 | 0.000534 | 0.000725 |
| 8039_41 | 14 | FAM177A1 | 35080874 | rs799489 | A | G | 0.232604 | -0.33955 | 0.083693 | 4.97E-05 | 0.000124 |
| 16060_99 | 14 | NID2 | 52036934 | rs62005419 | T | C | 0.422465 | -0.53732 | 0.140134 | 0.000126 | 0.000257 |
| 8923_94 | 14 | GALNT16 | 69308155 | rs2093010 | A | G | 0.070577 | -0.90816 | 0.265669 | 0.00063 | 0.000823 |
| 13473_55 | 15 | ITPKA | 41498472 | rs8023530 | C | T | 0.286282 | -1.11693 | 0.333683 | 0.000816 | 0.000995 |
| 3403_1 | 16 | TPSB2 | 1228728 | rs62032324 | G | A | 0.036779 | 0.930896 | 0.276638 | 0.000765 | 0.000945 |
| 2436_49 | 17 | CXCL16 | 4736730 | rs4790224 | G | A | 0.693837 | -0.41167 | 0.121884 | 0.000731 | 0.000914 |
| 7948_129 | 17 | GLTPD2 | 4789776 | rs4790224 | G | A | 0.693837 | -0.93327 | 0.309526 | 0.002569 | 0.002595 |
| 13125_45 | 17 | VTN | 28370188 | rs28998802 | A | G | 0.159046 | -0.52294 | 0.060153 | 3.52E-18 | 5.86E-17 |
| 19135_5 | 17 | NT5C3B | 41830658 | rs1004295 | G | C | 0.523857 | 0.849068 | 0.192495 | 1.03E-05 | 3.32E-05 |
| 15509_2 | 17 | NAGLU | 42540345 | rs1004295 | G | C | 0.523857 | -0.2605 | 0.052662 | 7.56E-07 | 3.60E-06 |
| 12534_10 | 17 | CALCOCO2 | 48848770 | rs55941919 | C | G | 0.161034 | -0.99057 | 0.322978 | 0.002162 | 0.002229 |
| 4342_10 | 19 | ICAM1 | 10278854 | rs34536443 | C | G | 0.028827 | -0.52567 | 0.078955 | 2.78E-11 | 3.09E-10 |
| 5124_69 | 19 | ICAM5 | 10293365 | rs34536443 | C | G | 0.028827 | 0.401821 | 0.059234 | 1.17E-11 | 1.47E-10 |
| 8245_27 | 19 | ICAM5 | 10293365 | rs34536443 | C | G | 0.028827 | 0.39749 | 0.058574 | 1.15E-11 | 1.47E-10 |
| 2687_2 | 19 | MIA | 40774569 | rs79228693 | A | G | 0.237575 | -0.58543 | 0.171341 | 0.000634 | 0.000823 |
| 9297_12 | 19 | B3GNT8 | 41427044 | rs148568752 | A | C | 0.039761 | 0.962123 | 0.28228 | 0.000653 | 0.000838 |
| 6444_15 | 19 | PSG3 | 42731060 | rs148568752 | A | C | 0.039761 | 0.761055 | 0.217939 | 0.000479 | 0.000685 |
| 9314_9 | 19 | PSG5 | 43176396 | rs148568752 | A | C | 0.039761 | 1.25091 | 0.379351 | 0.000975 | 0.001121 |
| 5649_83 | 19 | PSG4 | 43200000 | rs148568752 | A | C | 0.039761 | 1.63379 | 0.519365 | 0.001657 | 0.001781 |
| 9335_28 | 19 | PSG9 | 43240660 | rs148568752 | A | C | 0.039761 | -1.69602 | 0.540591 | 0.001705 | 0.001814 |
| 13116_25 | 19 | CD177 | 43358429 | rs148568752 | A | C | 0.039761 | -0.67767 | 0.193923 | 0.000475 | 0.000685 |
| 2816_50 | 19 | BCAM | 44815246 | rs148568752 | A | C | 0.039761 | -1.7572 | 0.575669 | 0.00227 | 0.002316 |
| 15615_8 | 19 | LILRB3 | 54219892 | rs73054973 | C | T | 0.010934 | 0.622798 | 0.18644 | 0.000836 | 0.001008 |
| 10442_1 | 19 | TMEM190 | 55377536 | rs73054973 | C | T | 0.010934 | -0.36663 | 0.099922 | 0.000243 | 0.000435 |
| 18916_25 | 20 | ITPA | 3216369 | rs6139288 | G | A | 0.692843 | 0.661643 | 0.175312 | 0.000161 | 0.000303 |
| 3803_10 | 20 | CST5 | 23877841 | rs111959052 | T | C | 0.017893 | 1.50194 | 0.486929 | 0.002039 | 0.002124 |
| 5634_39 | 20 | POFUT1 | 32223256 | rs853862 | C | T | 0.388668 | 1.60561 | 0.42244 | 0.000144 | 0.000279 |
| 12469_19 | 20 | MAPRE1 | 32835180 | rs853862 | C | T | 0.388668 | -1.37322 | 0.335735 | 4.31E-05 | 0.000119 |
| 15367_38 | 20 | BPIFB1 | 33291676 | rs853862 | C | T | 0.388668 | 0.833966 | 0.177009 | 2.46E-06 | 1.07E-05 |
| 5676_54 | 20 | ASIP | 34231956 | rs853862 | C | T | 0.388668 | 0.935408 | 0.201699 | 3.52E-06 | 1.47E-05 |
| 9183_7 | 21 | IFNAR1 | 33342126 | rs8129395 | C | T | 0.384692 | -0.81177 | 0.213673 | 0.000145 | 0.000279 |
| 5105_2 | 22 | RTN4R | 20262330 | rs34053785 | T | C | 0.089463 | -0.58749 | 0.176141 | 0.000852 | 0.001014 |

**Supplementary Table_3.** SNPs from the GRCh38 genome.

| rsid | chr.x | NA | pos | Allele1 | Allele2 | region | gene |
| --- | --- | --- | --- | --- | --- | --- | --- |
| rs1000500 | 8 | 0 | 60403161 | A | G | exon | LINC01301 |
| rs118177025 | 10 | 0 | 88290480 | C | G | exon | RNLS |
| rs2093010 | 14 | 0 | 68887010 | A | G | exon | HMGN1P3 |
| rs309387 | 4 | 0 | 1.23E+08 | T | A | exon | IL21-AS1 |
| rs34536443 | 19 | 0 | 10352442 | C | G | exon | TYK2 |
| rs7798877 | 7 | 0 | 99219070 | C | T | exon | KPNA7 |
| rs79228693 | 19 | 0 | 40883033 | A | G | exon | CYP2A7 |
| rs799489 | 14 | 0 | 34983096 | A | G | exon | SRP54 |
| rs949324 | 11 | 0 | 72003480 | G | C | exon | NUMA1 |
